# Supplementary material
Source: Springer Nature journal article supplement (https://www.springermedizin.de/resource/supplementary/13058_2006_1640_MOESM11_ESM.pdf/9699584)
Supplement: MOESM11 [file 9699584]

**Table 3.** Cox regression analysis for breast cancer death for patients with gene expression data (n=69-77)

|                                      | (a) Univariate analysis |               |          | (b) Multivariate analysis |               |          |
|--------------------------------------|-------------------------|---------------|----------|---------------------------|---------------|----------|
|                                      | <i>RR</i>               | <i>95% CI</i> | <i>P</i> | <i>RR</i>                 | <i>95% CI</i> | <i>P</i> |
| Age, $\geq 55$ years vs $< 55$ years | 1.22                    | 0.52-2.84     | 0.65     |                           |               |          |
| Tumor type (overall effect)          |                         |               | 0.32     |                           |               |          |
| Lobular (vs ductal)                  | 0.65                    | 0.28-1.51     | 0.31     |                           |               |          |
| Other (vs ductal)                    | 0.34                    | 0.05-2.53     | 0.29     |                           |               |          |
| Tumor size (overall effect)          |                         |               | 0.014    |                           |               |          |
| T2 (vs size T1)                      | 2.63                    | 0.88-7.86     | 0.085    |                           |               |          |
| T3-T4 (vs size T1)                   | 5.27                    | 1.61-17.2     | 0.006    |                           |               |          |
| Lymph node status (overall effect)   |                         |               | 0.016    |                           |               | 0.004    |
| pN1 (vs pN0)                         | 0.45                    | 0.16-1.26     | 0.13     | 0.47                      | 0.17-1.33     | 0.15     |
| pN2-pN3 (vs pN0)                     | 2.41                    | 0.95-6.08     | 0.064    | 3.42                      | 1.29-9.05     | 0.013    |
| Other* (vs pN0)                      | 2.12                    | 0.75-5.98     | 0.16     | 2.70                      | 0.93-7.78     | 0.067    |
| Histological grade (overall effect)  |                         |               | 0.68     |                           |               |          |
| G2 (vs G1)                           | 2.20                    | 0.30-16.3     | 0.44     |                           |               |          |
| G3 (vs G1)                           | 2.07                    | 0.25-16.8     | 0.50     |                           |               |          |
| TP53, mutation (vs wild type)        | 3.46                    | 1.66-7.21     | 0.002    | 4.43                      | 2.04-9.64     | 0.0004   |
| ER, positive (vs negative)           | 0.75                    | 0.35-1.63     | 0.48     |                           |               |          |
| PR, positive (vs negative)           | 0.71                    | 0.33-1.51     | 0.38     |                           |               |          |
| Gene expression (overall effect)     |                         |               | 0.006    |                           |               |          |
| Highly prolif. lum. (vs Luminal A)   | 6.59                    | 1.79-24.3     | 0.005    |                           |               |          |
| Normal like (vs LuminalA)            | 2.82                    | 0.71-11.3     | 0.14     |                           |               |          |
| Basal like (vs Luminal A)            | 6.93                    | 1.79-26.8     | 0.005    |                           |               |          |
| ERRB2 <sup>+</sup> (vs Luminal A)    | 5.82                    | 1.30-26.2     | 0.022    |                           |               |          |

\*Lymph nodes not removed
